# Supplementary material for: Biotechnological production of acetoin, a bio-based platform chemical, from a lignocellulosic resource by metabolically engineered Enterobacter cloacae
Source: Royal Society of Chemistry journal article supplement (doi:10.1039/c5gc01638j), 2015-10-21
Supplement: c5gc01638j1.pdf [file c5gc01638j1.pdf]

## Supplementary Information

### **Biotechnological production of acetoin, a bio-based platform chemical, from lignocellulosic resource by metabolically engineered *Enterobacter cloacae***

Lijie Zhang, Qiuyuan Liu, Yongsheng Ge, Lixiang Li, Chao Gao, Ping Xu<sup>#</sup> and  
Cuiqing Ma\*

State Key Laboratory of Microbial Technology, Shandong University, Jinan 250100,  
People's Republic of China

\*Corresponding author:

Mailing address for C. Ma: State Key Laboratory of Microbial Technology, Shandong University, Jinan 250100, People's Republic of China, Phone: 86-531-88364003, Fax: 86-531-88369463, E-mail: [macq@sdu.edu.cn](mailto:macq@sdu.edu.cn)

<sup>#</sup>Present address: School of Life Sciences & Biotechnology, Shanghai Jiao Tong University, Shanghai 200240, People's Republic of China

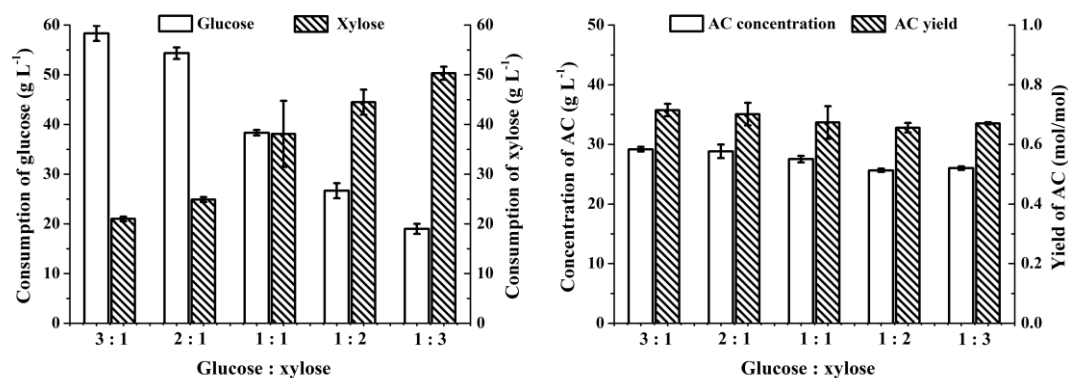

**Fig. S1 Effect of different ratios of glucose to xylose on the production of AC.**

The experiments were conducted in 500-mL Erlenmeyer flasks. The initial sugar (glucose and xylose) concentration was about 80 g L<sup>-1</sup>. The flasks with 100 mL of the fermentation medium were incubated at 37°C on a rotary shaker at 180 rpm. Data are the means  $\pm$  SDs from three parallel experiments.

Table S1 Primers used in this study

| Primer                                      | Sequence                              |
|---------------------------------------------|---------------------------------------|
| <i>P<math>\Delta</math>adhE.f (EcoRI)</i>   | GCCGAGCTCATGGCTGTTACCAATATC           |
| <i>P<math>\Delta</math>adhE.r (overlap)</i> | GTGAACCCAGTTTGTATCAGATCTTTAGGTGCG     |
| <i>P<math>\Delta</math>adhE.f (overlap)</i> | ACCTAAAGATCTGATACAAACTGGGTTACACAGT    |
| <i>P<math>\Delta</math>adhE.r (XbaI)</i>    | ATTATCTAGATCAGGCGCTTTTCTTCGC          |
| <i>NOX-f(NdeI)</i>                          | CTTGCCATATGAAAGTCACAGTTGTTG           |
| <i>NOX-r(SalI)</i>                          | CGTGCGTCGACTTAAGCGTAACTGATTGGGC       |
| <i>NDH-f (NdeI)</i>                         | CGTGCCATATGACTACGCCATTGAAAA           |
| <i>NDH-r(SalI)</i>                          | CGTGCGTCGACTTAGTGCAGCTTCAGGCGCGGGC    |
| <i>VHb-f(NdeI)</i>                          | CGTGCCATATGTTAGACCAGCAAACCAT          |
| <i>VHb-r(SalI)</i>                          | CGTGCGTCGACTTATTCAACCGCTTGAGC         |
| <i>Promoter-f(BglII)</i>                    | G TTCAGATCTCAATTCCGACGTCTAAG          |
| <i>Promoter-r(XbaI)</i>                     | CTTGTCTAGAGGTCAGTGCGTCCTGCT           |
| <i>P<sub>5-nox</sub>-f1(BglII)</i>          | AGATCTCAATTCCGACGTCTAAGAAGC           |
| <i>P<sub>5-nox</sub>-r2</i>                 | GTTTGAGACGTTTTAGATTTAAGCGTAACTGATTGG  |
| <i>P<sub>b-galP</sub>-f3</i>                | CCAATCAGTTAACGCTTAAATCTAAAACGTCTCAAAC |
| <i>P<sub>b-galP</sub>-r4(SacI)</i>          | GAGCTCTTAGTCGTGTGCGCCG                |

Table S2 Sequences of promoter library

| Promoter             | Sequence                                                                                                                                                                |
|----------------------|-------------------------------------------------------------------------------------------------------------------------------------------------------------------------|
| <i>P<sub>1</sub></i> | caattccgacgtctaaggaaccattatcatgacatcaacctataaaaataggcgatcacgaggccctctcgt<br>tccacctcaagctccctatctagtgatagcgattgacatccctatcagtgacggagatattgagcacatcagcag<br>gacgcactgacc |
| <i>P<sub>2</sub></i> | caattccgacgtctaagaaaccattattatcatgacattaacctataaaaataggcgatcacgaggcccttcgt<br>cttcacctcgagtcctatcagtgatagagattgacctccctatcagtgatagagatactgagcacatcagcag<br>gacgcactgacc |
| <i>P<sub>3</sub></i> | caattccgacgtctaagaagccattactatcatgacattaacctataggaataggcgatcacggggcccttcg<br>ccttcacctcgatccctgtcagtgctagagattgacatccctaccggtgataaagatactgagcacatcagca<br>ggacgcactgacc |
| <i>P<sub>4</sub></i> | caattccgacgtctaagaaaccattattatcatgacattagcctataaaaataggcgatcacgaggcccttcgt<br>cttcacctcgagtcctatcagtgatagagattgacaccctatcagtgatagagatactgagcacatcagcag<br>gacgcactgacc  |
| <i>P<sub>5</sub></i> | caattccgacgtctaagaagccattattatcatgacattaacctataaaaataggcgatcacgaggcccttcgt<br>cttcacctcgagtcctatcagcgatagagattgacatccctatcagtgaccgagatactgagcacatcagcag<br>gacgcactgacc |
